# Supplementary material for: Shigella flexneri Adherence Factor Expression in In Vivo-Like Conditions
Source: PubMed Central journal article supplement (PMC6854044; doi:10.1128/msphere.00751-19), 2019-11-13

Supplemental Figure S1

A. Additional images of *S. flexneri* 2457T

80,000 X

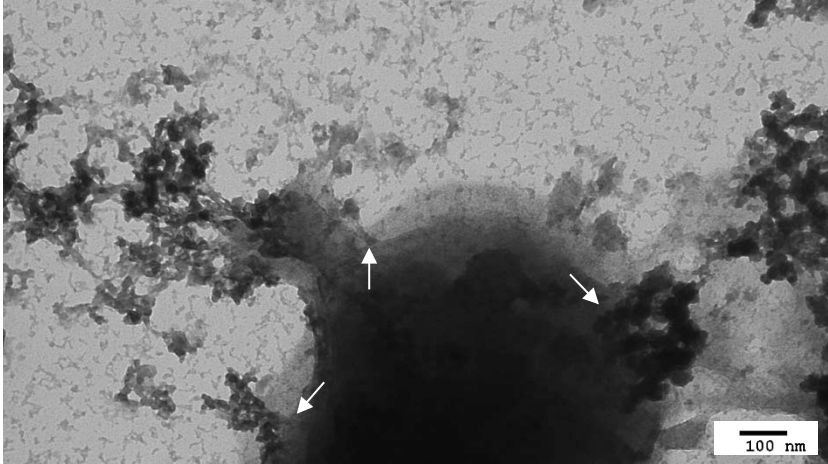

50,000 X

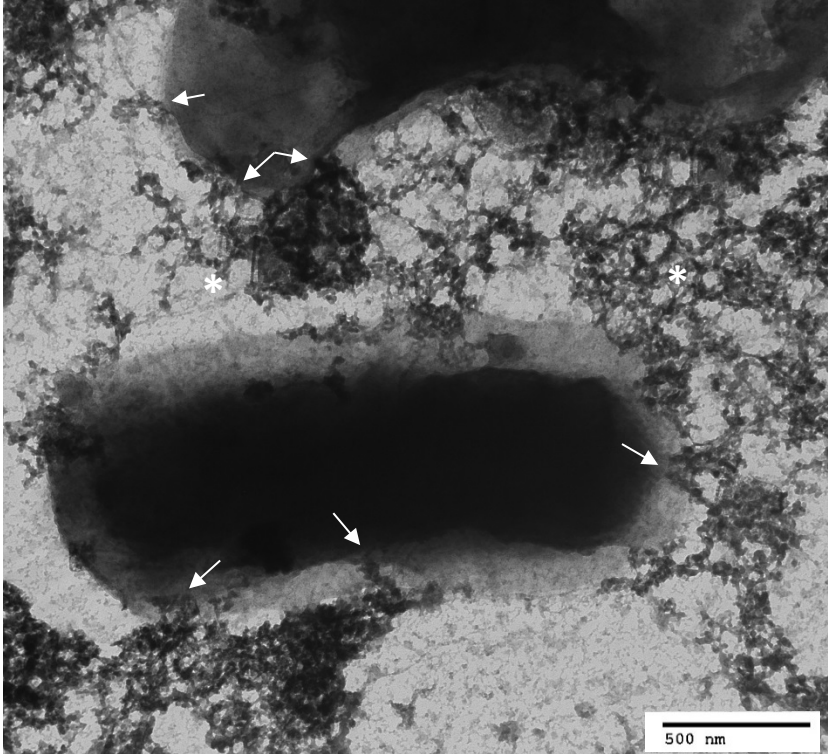

150,000 X

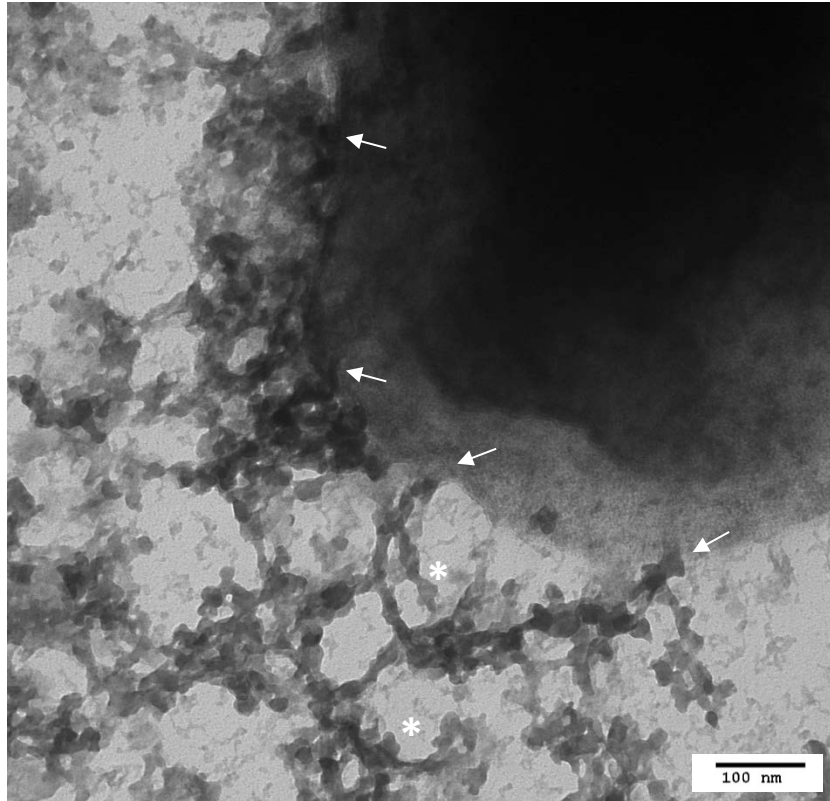

250,000 X

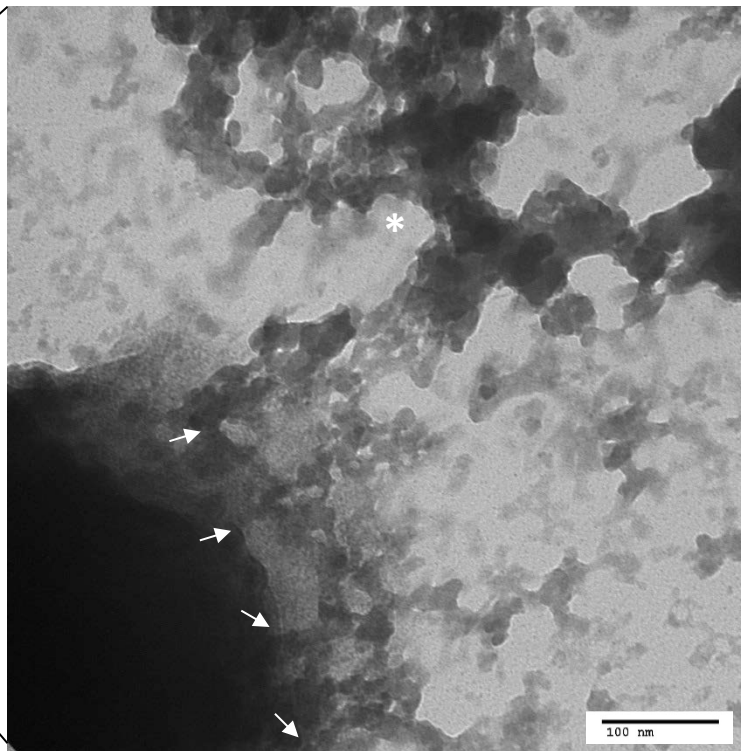

150,000 X

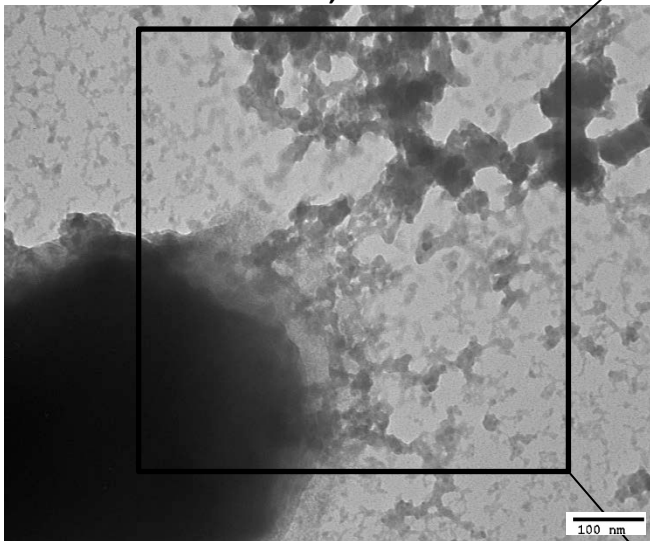

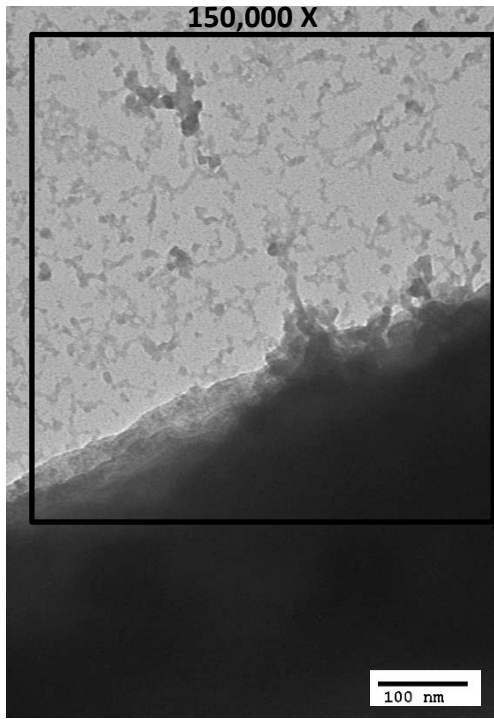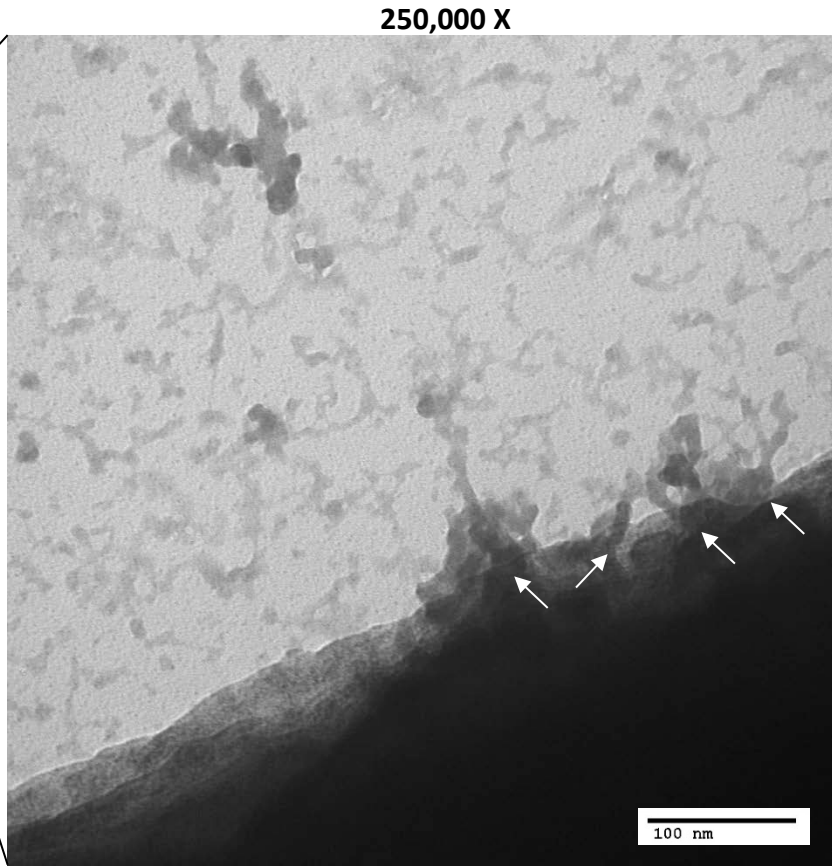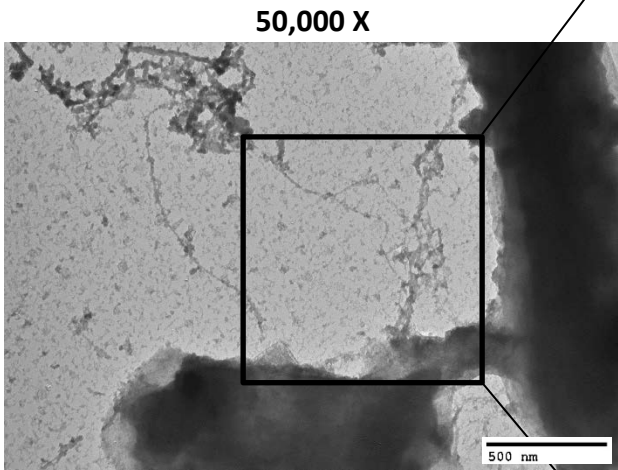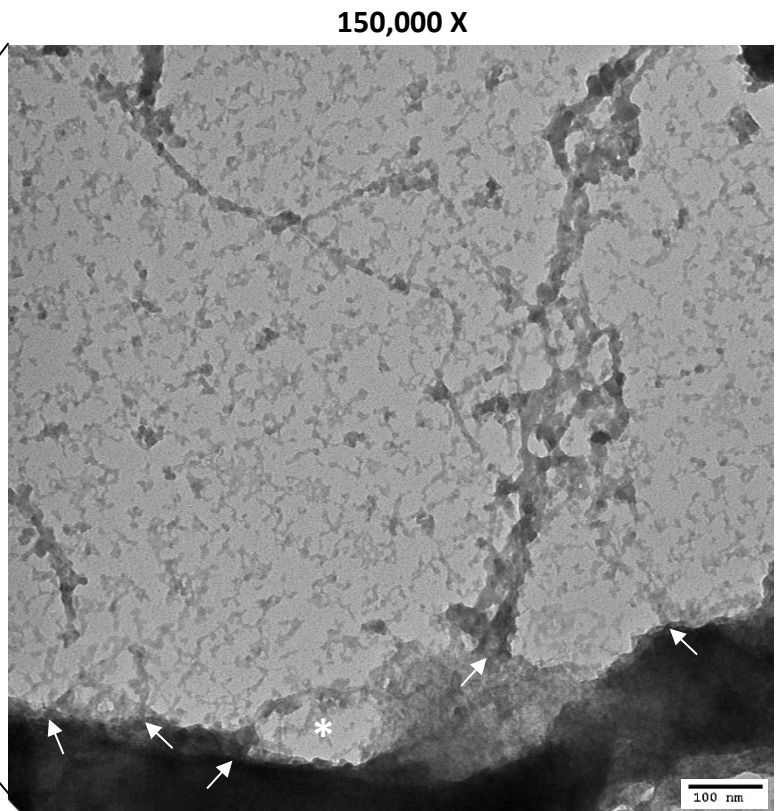

**B. TSB + Bile Salts**

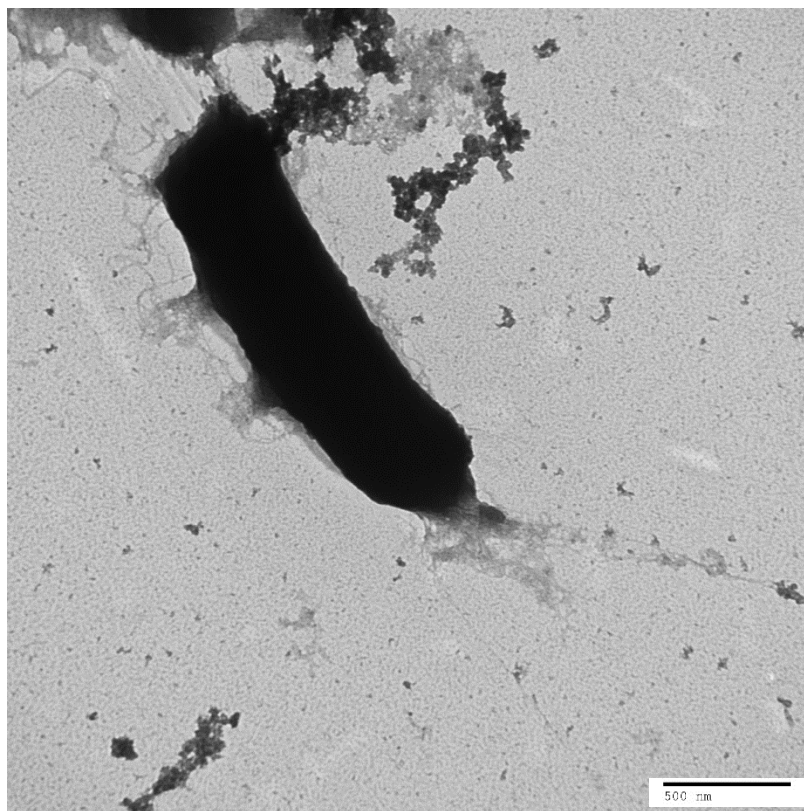

**C. Media control images**

**LB + 2% glucose + 0.4% bile salts**

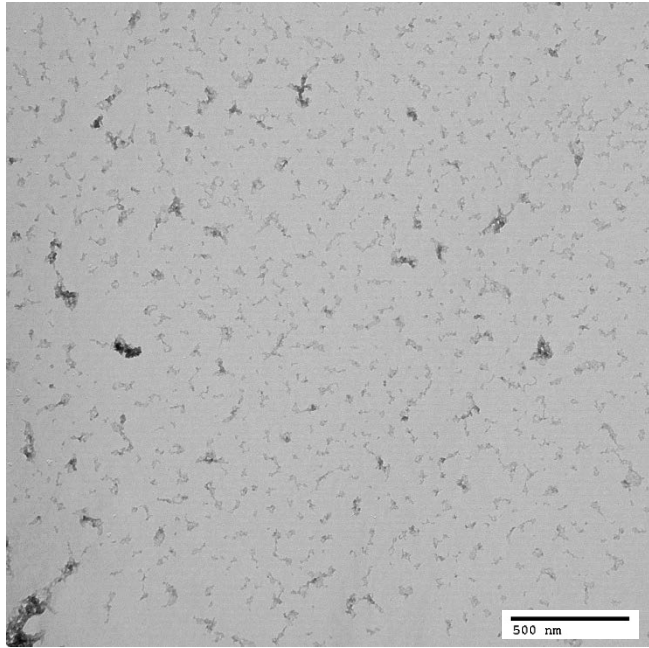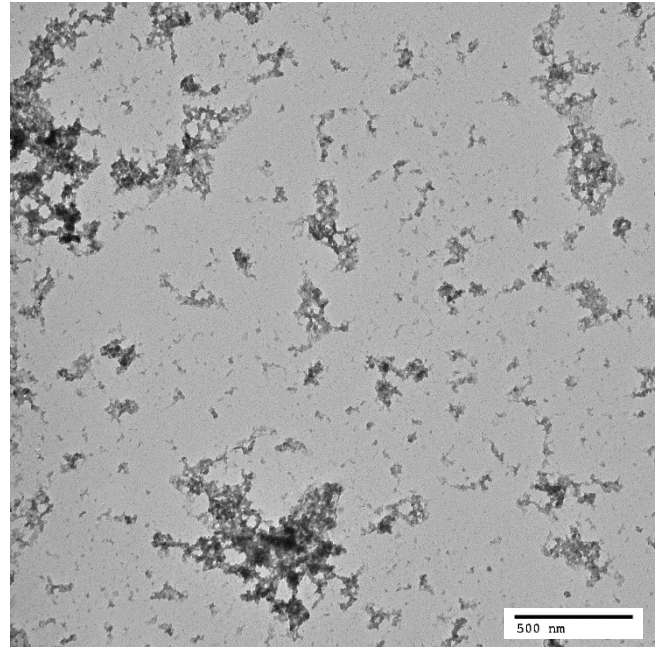

**D. *S. flexneri* 2457T IVLC biofilm sample**

**Area without bacteria**

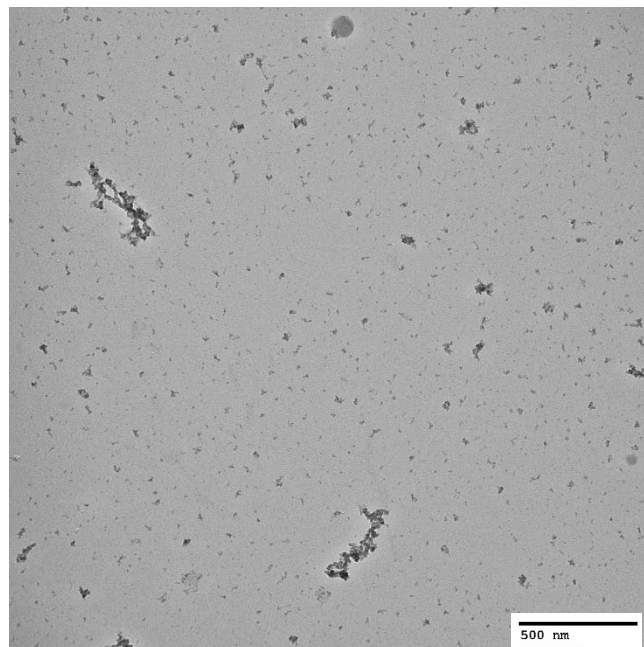

Supplement: mSphere.00751-19-sf001.pdf [file mSphere.00751-19-sf001.pdf]
