# Supplementary material for: Shigella flexneri Adherence Factor Expression in In Vivo-Like Conditions
Source: PubMed Central journal article supplement (PMC6854044; doi:10.1128/msphere.00751-19), 2019-11-13

## Supplemental Figure S2

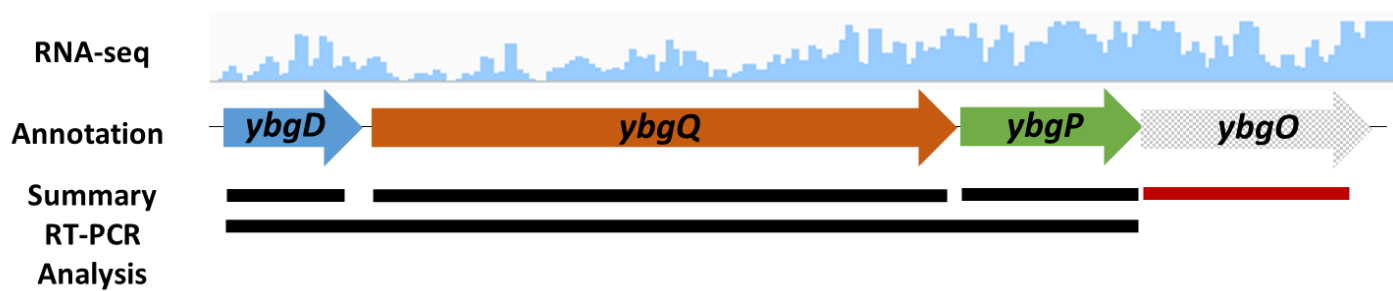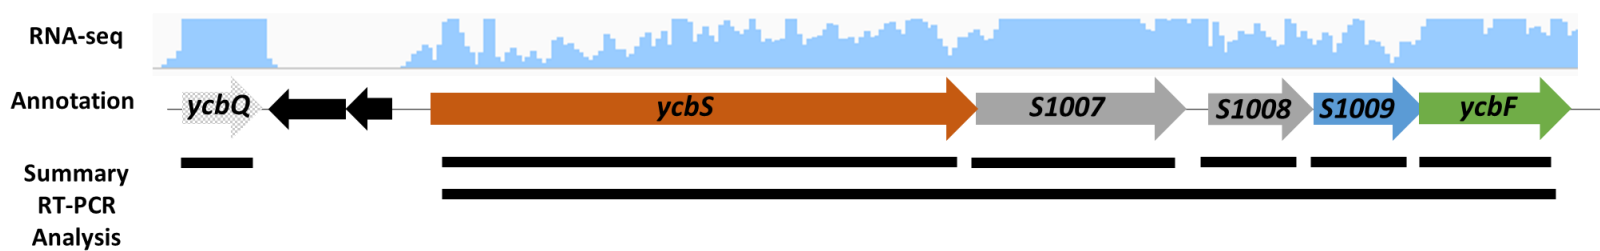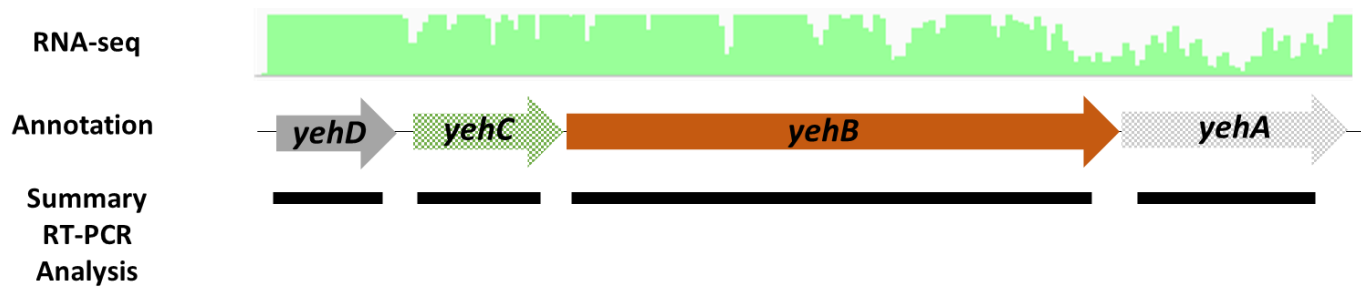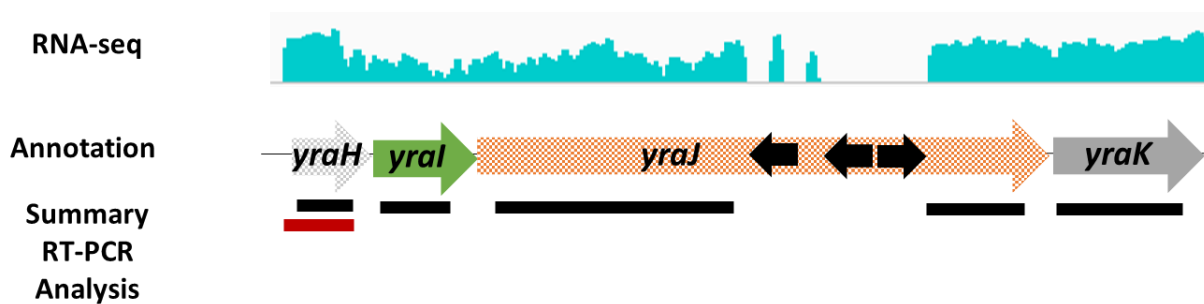

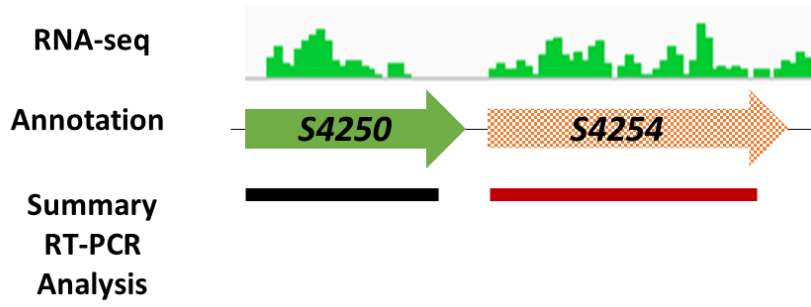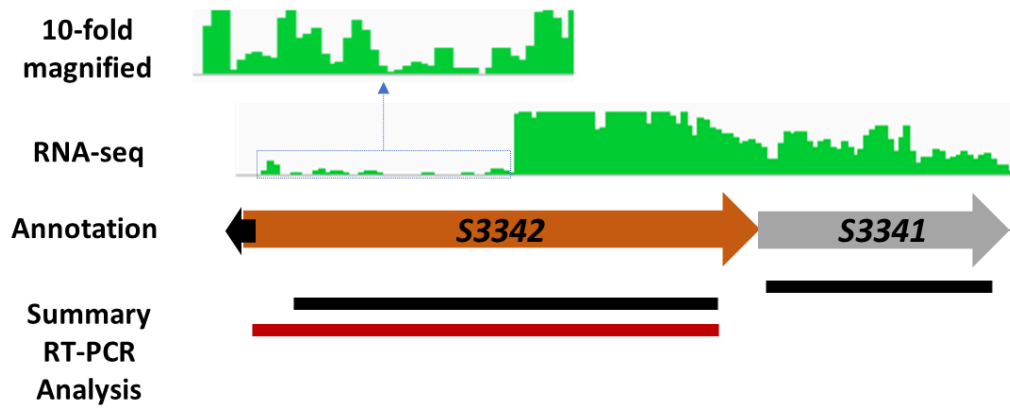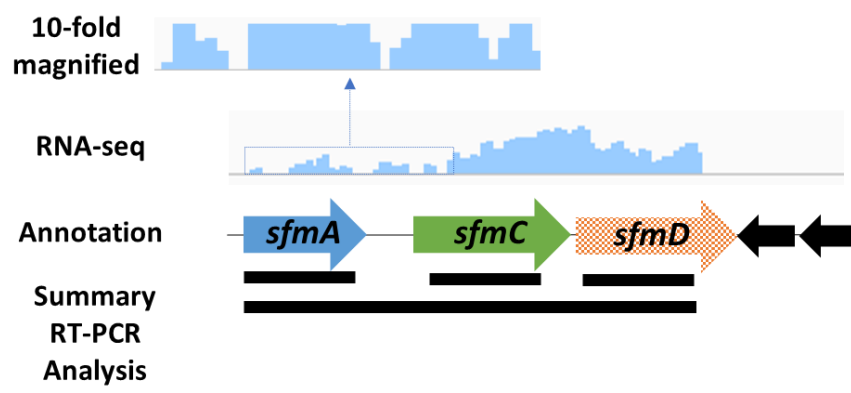

Supplement: mSphere.00751-19-sf002.pdf [file mSphere.00751-19-sf002.pdf]
